# Supplementary material
Source: Springer Nature journal article supplement (https://www.springermedizin.de/resource/supplementary/12936_2012_2602_MOESM2_ESM.pdf/9543242)
Supplement: MOESM2 [file 9543242]

Sequence Name < Pos = 378

| Sequence Name       | 380                                                                                                                                                                 | 390 | 400 | 410 | 420 | 430 | 440 | 450 | 460 | 470 | 480 | 490 | 500 | 510 | 520 | 530 | 540 |
|---------------------|---------------------------------------------------------------------------------------------------------------------------------------------------------------------|-----|-----|-----|-----|-----|-----|-----|-----|-----|-----|-----|-----|-----|-----|-----|-----|
| Consensus           | -----GATTACTTCCAAGCCG---AAGCAAAGAAAGTCCTTAAATA--TGATGCAGT---AA-GAAAT-A-----TAAGGCTAAGATAT-GTACATTAAGTTGAAATGATG-TG--TATCAACTA--TGTGGATTAAGCTAGAAGCGAATCACTAGT       |     |     |     |     |     |     |     |     |     |     |     |     |     |     |     |     |
| 31 Sequences        | 380 390 400 410 420 430 440 450 460 470 480 490 500 510 520 530 540                                                                                                 |     |     |     |     |     |     |     |     |     |     |     |     |     |     |     |     |
| Pknowlesi.seq       | ACCACATCTAAGGAAGGCAGCAGGCGCG---TAAATTACCCAA-TTCTAAGAAGAGAGGTAGTGACAA-GAAATAACA-AT-ACAAGGCCAA-TC-T-GGCTTTGTAATTGGAATGATGGGAATTTAAACCTTCCCAAAT-CAATTGGAGGGCAAGTCTGGT  |     |     |     |     |     |     |     |     |     |     |     |     |     |     |     |     |
| Pmalariae.seq       | ACCACATCTAAGGAAGGCAGCAGGCGCG---TAAATTACCCAA-TTCTAAGAAGAGAGGTAGTGACAA-GAAATAACA-AT-GCAAGGCCAAATTTT-GTTTTGCAATTGGAATGATGGGAATTTAAACCTTCCCAAGG-CAATTGGAGGGCAAGTCTGGT   |     |     |     |     |     |     |     |     |     |     |     |     |     |     |     |     |
| Povale.seq          | ACCACATCTAAGGAAGGCAGCAGGCGCG---TAAATTACCCAA-TTCTAAGAAGAGAGGTAGTGACAA-GAAATAACA-AT-ACAAGGCCATTTTCAT-GTTTTGTAATTGGAATGATGGGAATTTAAACCTTCCCAAAT-CAATTGGAGGGCAAGTCTGGT  |     |     |     |     |     |     |     |     |     |     |     |     |     |     |     |     |
| Pyoelii.seq         | ACCACATCTAAGGAAGGCAGCAGGCGCG---TAAATTACCCAAATCTAAATAAGAGAGGTAGTGACAA-GAAATAACA-AT-ATAAGGCCAAAT-T-TGGTTTATAATTGGAATGATGGGAATTTAAACCTTCCCAAAT-CAATTGGAGGGCAAGTCTGGT   |     |     |     |     |     |     |     |     |     |     |     |     |     |     |     |     |
| Slide 52_clone1.seq | -----GATTACTTCCAAGCCG---AAGCAAAGAAAGTCCTTAAATA--TGTTGCAGTTA-AAACG-----GGAGTTTAAGGCAA-CAACAGGGGCTTTAAAT---TG--TATCAGTTA--TGTGGATTAAGCTAGAAGCGAATCACTAGT              |     |     |     |     |     |     |     |     |     |     |     |     |     |     |     |     |
| Slide 53_clone1.seq | -----GATTACTTCCAAGCCG---AAGCAAAGAAAGTCCTTACTTC--CAAGCCGAAGAAAGCAAAG-----TCCTTACTTCCAAGCCGAAGCAAAGAAAGTCCTTACTTC--CAA-GCCGAAGCA---ATACCTCCAGCTGTTTGACAATCACTAGT      |     |     |     |     |     |     |     |     |     |     |     |     |     |     |     |     |
| Slide 53_clone2.seq | -----GATTACTTCCAAGCCG---AAGCAAAGAAAGTCCTTAAAT--TGTTG-----GAGTTTAAGGCAA-CAACAGGAGCGTTAAAT---TG--TATCAGTTA--TGTGGATTAAGCTAGAAGCGAATCACTAGC                            |     |     |     |     |     |     |     |     |     |     |     |     |     |     |     |     |
| Slide 55_clone1.seq | -----GATTACTTCCAAGCCG---AAGCAAAGAAAGTCCTTAGAAC--TTAGATA-----C-----CCAGGTAA-TTGATCGGCTTGGAGG-----TATCAGTTA--TGTGGATTAAGCTAGAAGCGAATCACTAGT                           |     |     |     |     |     |     |     |     |     |     |     |     |     |     |     |     |
| Slide 56_clone1.seq | -----GATTACTTCCAAGCCG---AAGCAAAGAAAGTCCTTA-----AATCG-----GTGACGTAG-GCACAGTCGTTTTACACGTCGTG--TATCAGTTA--TGTGGATTAAGCTAGAAGCGAATCACTAGT                               |     |     |     |     |     |     |     |     |     |     |     |     |     |     |     |     |
| Slide 61_clone1.seq | -----CG---CTTCTAGCTTAA--TCCACATAACTGATACTTCGTATC-GACTTTGTGCGC-ATTTTGCTATTATGT-GTTCTTTTAAATTAATGATTCTTTTAAAGGACTTTCTTTGCTTC-GGCTTGGAAAT                              |     |     |     |     |     |     |     |     |     |     |     |     |     |     |     |     |
| Slide 61_clone2.seq | -----GATTACTTCCAAGCCG---AAGCAAAGAAAGTCCTTAAATCGGTGACGTA-----TCAGCTAT-GTGGATTAAGCTAGAAG---G--TATCAGTTA--TGTGGATTAAGCTAGAAGCGAATCACTAGT                               |     |     |     |     |     |     |     |     |     |     |     |     |     |     |     |     |
| Slide 64_clone1.seq | -----CG---CTTCTAGCTTAA--TCCACATAACTGATAACCCT-----GTTGTTGC-----CTTAAACTCT-T-GCGTTTTAA-CTGCAACAATTTT---AAGGACTTTCTTTGCTTC-GGCTTGGAAAT                                 |     |     |     |     |     |     |     |     |     |     |     |     |     |     |     |     |
| Slide 64_clone2.seq | -----GATTCTG---CTTCTAGCTTAA--TCCACATAACTGATAC-----GACGTTG-----TAAACGAC-T-GTGCT--A-CGTACCCGATTT---AAGGACTTTCTTTGCTTC-GGCTTGGAAATCACTAGT                              |     |     |     |     |     |     |     |     |     |     |     |     |     |     |     |     |
| Slide 64_clone3.seq | -----GATTACTTCCAAGCCG---AAGCAAAGAAAGTCCTTAAAT--TGTTGCAGTTA-AAACG-----GAGTTTAAGGCAA-CAACAGGAGGTTTAAAT---TG--TATCAGTTA--TGTGGATTAAGCTAGAAGCGAATCACTAGT                |     |     |     |     |     |     |     |     |     |     |     |     |     |     |     |     |
| Slide 70_clone1.seq | -----GATTACTTCCAAGCCG---AAGCAAAGAAAGTCCTTA-----AATCG-----GTGACGTAG-GCACAGTCGTTTTAA-----G--TATCAGTTA--TGTGGATTAAGCTAGAAGCGAATCACTAGT                                 |     |     |     |     |     |     |     |     |     |     |     |     |     |     |     |     |
| Slide 70_clone2.seq | -----GATTACTTCCAAGCCG---AAGCAAAGAAAGTCCTTAAAC--TGTTGCAGTTA-AAACGTA-----AGGAGTTAAGGCAA-CTACAGGAGCTTTAAAT---TG--TATCAGTTA--TGTGGATTAAGCTAGAAGCGAATCACTAGT             |     |     |     |     |     |     |     |     |     |     |     |     |     |     |     |     |
| Slide 71_clone1.seq | -----CGATTCG---CTTCTAGCTTAA--TCCACATAACTGATACC-----TTA-----GATACCCT-G-GTAATTTGATCGGCTTGGAAAT---AAGGACTTTCTTTGCTTC-GGCTTGGAAATCACTAGT                                |     |     |     |     |     |     |     |     |     |     |     |     |     |     |     |     |
| Slide 71_clone2.seq | -----GATTACTTCCAAGCCG---AAGCAAAGAAAGTCCTTAAATCGGTGACGTAGGCACAGTCGTTTTACACGTCGTGCGTATCAGTTAT-GTGGATTAAGCTAGAAGCG---G--TATCAGTTA--TGTGGATTAAGCTAGAAGCGAATCACTAGT      |     |     |     |     |     |     |     |     |     |     |     |     |     |     |     |     |
| Slide 71_clone3.seq | -----GATTACTTCCAAGCCG---AAGCAAAGAAAGTCCTTAGAATA-TCAGGCAG-----TATCAGTTAT-GTGGATTAAGCTAGAAGCG---G--TATCAGTTA--TGTGGATTAAGCTAGAAGCGAATCACTAGT                          |     |     |     |     |     |     |     |     |     |     |     |     |     |     |     |     |
| Slide 72_clone1.seq | -----GATTACTTCCAAGCCG---AAGCAAAGAAAGTCCTTAGAAC--TTAGATA-----C-----CCAGGTAA-TTGATCGGCTTGGAGG-----TATCAGTTA--TGTGGATTAAGCTAGAAGCGAATCACTAGT                           |     |     |     |     |     |     |     |     |     |     |     |     |     |     |     |     |
| Slide 72_clone2.seq | -----GATTCG---CTTCTAGCTTAA--TCCACATAACTGATACCAC-----GACGTTG-----TAAACGAC-T-GTGCT--A-CGTACCCGATTT---AAGGACTTTCTTTGCTTC-GGCTTGGAAATCACTAGT                            |     |     |     |     |     |     |     |     |     |     |     |     |     |     |     |     |
| Slide 83_clone1.seq | -----GATTCG---CTTCTAGCTTAA--TCCACATAACTGATACTTCGTATC-GACTTTGTGCGC-ATTTTGCTATTATGT-GTTCTTTTAAATTAATGATTCTTTTAAAGGACTTTCTTTGCTTC-GGCTTGGAAATCACTAGT                   |     |     |     |     |     |     |     |     |     |     |     |     |     |     |     |     |
| Slide 86_clone1.seq | -----GATTACTTCCAAGCCG---AAGCAAAGAAAGTCCTTAGTCC--T--TA-----AATCG-----GTGACGTAG-GCACAGTCATTTTACACGTCGTGG-TATCAGTTA--TGTGGATTAAGCTAGAAGCGAATCACTAGT                    |     |     |     |     |     |     |     |     |     |     |     |     |     |     |     |     |
| SlideBrazil.seq     | -----ACTTCCAAGCCG---AAGCAAAGAAAGTCCTTAAAAA---GAATCATTTTAAATTAAGAAGCACATAATAG---CAAAATGC-GCACA--AAGTCGATACGAAGTATC-AGTTA-----TGTGGATTAAGCTAGAAGCG                    |     |     |     |     |     |     |     |     |     |     |     |     |     |     |     |     |
| 18S PVX_079693.seq  | TTTCAAAGAATCGATATTTAAGCAACG---CTTCTAGCTTAA--TCCACATAACTGATACTTCGTATC-GACTTTGTGCGC-ATTTTGCTATTATGT-GTTCTTTTAAATTAATGATTCTTTTAAAGGACTTTCTTTGCTTC-GGCTTGGAAAT          |     |     |     |     |     |     |     |     |     |     |     |     |     |     |     |     |
| 18S PVX_088859.seq  | -----AGTAACAAAATCTTCCATATGGTT--AAGGTAAAGAAGATTTTAAAAA---GAAACACTTTAATTAAAAAAACGCTTGATAGG--TAGGATGC-GCACAG-AAGCCGAAACCGTGATTG-GCTCAACCCCTTGTGGATCTAGTAACGGCG--TTATT  |     |     |     |     |     |     |     |     |     |     |     |     |     |     |     |     |
| 18S PVX_096002.seq  | -----AGTAACAAGGACTTCCATGCCG---AAGCAAAGAAAGTCCTTAAAAA---GAATCATTTTAAATTAAGAAGCACATAATAG---CAAAATGC-GCACA--AAGTCGATACGAAGTATC-AGTTA-----TGTGGATTAAGCTAGAAGCG--TTGCTT  |     |     |     |     |     |     |     |     |     |     |     |     |     |     |     |     |
| 18S PVX_097020.seq  | -----AGTAACAAGGACTTCCAAGCCG---AAGCAAAGAAAGTCCTTAAAAA---GAATCATTTTAAATTAAGAAGCACATAATAG---CAAAATGC-GCACA--AAGTCGATACGAAGTATC-AGTTA-----TGTGGATTAAGCTAGAAGCG--TTGCTT  |     |     |     |     |     |     |     |     |     |     |     |     |     |     |     |     |
| Pberghei.seq        | GATATTTTCAATGATACAACAAATATAGGAAATGTGTGTACAAGCTTCACATA-CAAATATAT---A---AGACAAGCCATTTTGCAATTAATATTTTATTTTAAATTTATCTTTTTTATAGCAAAAAAAA---ATAAATAACATAAGAAAAATATATTAAC  |     |     |     |     |     |     |     |     |     |     |     |     |     |     |     |     |
| Pcynomolgi.seq      | ACCACATCTAAGGAAGGCAGCAGGCGCG---TAAATTACCCAA-TTCTAAGAAGAGAGGTAGTGACAA-GAAATAACA-AT-ACAAGGCCAA-TC-T-GGCTTTGTAATTGGAATGATGGGAATTTAAACCTTCCCAAAT-CAATTGGAGGGCAAGTCTGGT  |     |     |     |     |     |     |     |     |     |     |     |     |     |     |     |     |
| Pfalciparum.seq     | ACCACATCTAAGGAAGGCAGCAGGCGCG---TAAATTACCCAA-TTCTAAGAAGAGAGGTAGTGACAA-GAAATAACA-AT-GCAAGGCCAAATTTT-GTTTTGTAATTGGAATGGTGGGAATTTAAACCTTCCCAAGTAAACAATTGGAGGGCAAGTCTGGT |     |     |     |     |     |     |     |     |     |     |     |     |     |     |     |     |
